# Supplementary material for: Fertility-sparing treatment for low-grade endometrial stromal sarcoma
Source: Research Square preprint supplement (doi:10.21203/rs.3.rs-7098205/v1), 2025-08-27
Supplement: Supplementary file 1 [file 7ac610661b57362497a33c03.xlsx]

## Sheet: All data
No	Ovarian preservation	Fertility sparing	Recurrence	Mortality	DFS (months)	OS (months)	Surgical routes	Extrauterine LGESS	Uterine pathology	Age at diagnosis	Age groups	Menopause	Gravidity	Parity	Attempting pregnancy	Interval to conception since last treatment (months)	Conceptive methods	Reasons of not attempting pregnancy	Pregnant times	Abortion times	Number of live birth	Live birth weeks	Complications during pregnancy	Treatment after recurrence	Personal cancer history	Family cancer history	Max diameter of tumor (mm)	FIGO stage	No	LVSI	ER(+)	PR(+)	MI>5	Definite mitotic	Retroperitoneal lymphadenectomy	Metastasis to retroperitoneal lymph nodes	Hormone treatment	Chemotherapy	Radiotherapy	Hormone regimens	Hormone treatment periods (months)	Chemotherapy regimens	Chemotherapy courses	Recurrent sites	Birth date	Diagnosis date	Recurrent or follow-up date	Death or follow-up date
LGE0064	Yes	Yes	No	No	24.7333	24.7333	Lap			33.4712	2	No	0	0	Yes	10	IVF		1	0	1	36	Preterm				60	I	LGE0064	No	Yes	No	No	1-3	No		Yes	No	No	GnRHa/Aromatase inhibitor	5				1984-12-08	2018-05-21	2020-06-01	2020-06-01
LGE0002	Yes	Yes	Yes	No	71.8333	93.7667	Hys			27.7644	1	No	1	1	Yes	14	Natural		1	0	1	38		Accepted non-fertility sparing surgeries after live birth				IA	LGE0002	No	Yes	No	No	<1	No		Yes	No	No	Progestin	12			Uterus, lung	1984-07-21	2012-04-19	2018-03-14	2020-01-01
LGE0001	Yes	Yes	Yes	No	38.5333	88.2667	Open			26.0192	1	No	1	1	Yes	12	Natural		1	0	1	38		Accepted non-fertility sparing surgeries after live birth		Uncle, stomach	50	I	LGE0001	No	Yes	Yes	No	3-5	No		No	Yes	No			PEI	4	Uterus, lung	1986-10-01	2012-10-01	2015-12-01	2020-01-01
LGE0063	Yes	Yes	No	No	56.9667	56.9667	Hys			33.1726	2	No	1	0	Yes	11	Natural		1	0	1	38	Hypertension				30	I	LGE0063	No	Yes	Yes	Yes	5-10	No		Yes	No	No	GnRHa	6				1982-03-04	2015-04-28	2020-01-01	2020-01-01
LGE0065	Yes	Yes	No	No	55.0333	55.0333	Hys			25.7151	1	No	0	0	Yes	20	Natural		1	0	1	38						I	LGE0065	No	Yes	Yes	No	3-5	No		Yes	No	No	Progestin	12				1989-10-13	2015-06-25	2020-01-01	2020-01-01
LGE0066	Yes	Yes	No	No	21.3333	21.3333	Hys			20.2137	1	No	0	0	Yes	10	Natural		1	0	1	38					37	I	LGE0066	No	Yes	Yes	No	3-5	No		Yes	No	No	Progestin	6				1998-01-18	2018-04-01	2020-01-01	2020-01-01
LGE0004	Yes	Yes	Yes	No	18.5667	69.1333	Open			24.5342	1	No	3	2	Yes	10	Natural		2	0	2	40		Accepted repeated fertility sparing surgeries after twice live births, and then relapse again, and then accepted non-fertility sparing surgeries				I	LGE0004	No	Yes	Yes	No	3-5	No		No	No	No					Retrospective lymph nodes	1989-10-21	2014-04-28	2015-11-06	2020-01-01
LGE0062	No	No	Yes	No	5.13333	46.7333	Lap			47.7205	2	No	3	1													40	IB	LGE0062	No	Yes	Yes	No	<1	Yes	No	No	No	No					Vaginal stump	1968-06-22	2016-02-29	2016-08-01	2020-01-01
LGE0054	No	No	Yes	No	8.66667	29.7	Lap			45.1644	2	No	2	1												Father, duodenum	86	I	LGE0054	No	Yes	No	No	<1	Yes	No	Yes	No	No	Aromatase inhibitor	2			Pelvic and peritoneal cavity	1972-06-05	2017-07-24	2018-04-10	2020-01-01
LGE0017	No		Yes	No	78.1333	98.4333	Open	Unknown	Myoma	49.5315	2	Yes	3	1													147		LGE0017	No	Yes	Yes	Yes	>10	No		Yes	No	No	Aromatase inhibitor	30			Pelvic and peritoneal cavity	1962-11-01	2012-05-01	2018-10-01	2020-06-01
LGE0045	No	No	Yes	No	62.4333	92.2333	Lap			45.0384	2	No	1	1													59	IC	LGE0045	Yes	Yes	Yes	Yes	>10	No		Yes	No	Yes	Progestin	12			Pelvic cavity	1967-06-02	2012-06-04	2017-07-21	2020-01-01
LGE0059	No	No	Yes	No	23.4667	53.8333	Open			48.7918	2	No	1	1													170	IC	LGE0059	No	Yes	Yes	Yes	>10	No		No	No	No					Pelvic cavity	1966-10-27	2015-07-31	2017-07-04	2020-01-01
LGE0021	Yes	Yes	Yes	No	5.53333	58.3	Open			16.4795	1	No	0	0	No			Unmarried						Accepted repeated fertility sparing surgeries, and then relapse again, and then accepted non-fertility sparing surgeries			43	IC	LGE0021	Yes	No	Yes	Yes	>10	Yes	No	Yes	No	No	Progestin	6			Pelvic cavity	1998-09-29	2015-03-19	2015-09-01	2020-01-01
LGE0006	Yes	Yes	Yes	No	22.8667	43.1667	Open			28.6192	1	No	1	0	Yes									Accepted non-fertility sparing surgeries			100	IIIB	LGE0006	No	Yes	Yes	No	1-3	No		No	No	No					Pelvic and peritoneal cavity	1988-04-09	2016-11-14	2018-10-01	2020-06-01
LGE0009	Yes	No	Yes	No	24.0333	94.0333	Open			32.9918	2	No	4	1													80	IIB	LGE0009	No	Yes	Yes	No	1-3	No		No	No	No					Pelvic cavity	1979-04-23	2012-04-11	2014-04-02	2020-01-01
LGE0011	Yes		Yes	No	34.9	69.2	Vaginal	Vaginal	Normal	35.5205	2	No	3	2													30		LGE0011	No	Yes	Yes	No	1-3	No		No	No	No					Vagina	1978-10-27	2014-04-26	2017-03-08	2020-01-01
LGE0020	Yes	Yes	Yes	No	17.4333	52.9	Open			38.8658	2	No	2	1	No			None						Accepted non-fertility sparing surgeries			80	IIIB	LGE0020	No	Yes	Yes	No	1-3	No		Yes	No	No	Progestin	9			Pelvic and peritoneal cavity	1976-10-25	2015-08-28	2017-02-01	2020-01-01
LGE0022	Yes	Yes	Yes	No	26.4667	77.2	Hys			34.9178	2	No	1	1	No			None						Accepted non-fertility sparing surgeries				I	LGE0022	No	Yes	Yes	No	1-3	No		No	No	No					Uterus	1978-10-07	2013-08-29	2015-11-01	2020-01-01
LGE0032	Yes	No	Yes	No	23.7333	23.7333	Open			28.3589	1	No	1	1													73	IIB	LGE0032	Yes	Yes	Yes	No	1-3	No		Yes	No	No	Progestin	12			Vaginal stump	1990-02-16	2018-06-20	2020-06-01	2020-06-01
LGE0044	No	No	Yes	No	19	42.3333	Lap			34.9315	2	No	3	0													13	IC	LGE0044	Yes	Yes	Yes	No	1-3	No		Yes	No	Yes	Progestin	19			Pelvic and peritoneal cavity	1982-01-12	2016-12-09	2018-07-02	2020-06-01
LGE0053	No	No	Yes	No	27.2667	27.6333	Lap			64.8164	3	Yes	1	1													50	I	LGE0053	No	Yes	Yes	No	1-3	No		Yes	No	No	Progestin	14			Vaginal stump	1953-05-17	2018-02-23	2020-05-21	2020-06-01
LGE0012	No		Yes	No	46.6667	87.2333	Vaginal	Vaginal	Normal	47.9562	2	No	3	1												Sister, lung	40		LGE0012	No	Yes	Yes	No	3-5	No		No	No	No					Vagina	1964-11-29	2012-11-01	2016-09-01	2020-01-01
LGE0026	Yes	No	Yes	No	43.3	79.2	Open			52.2247	3	Yes	7	2													60	IC	LGE0026	No	Yes	Yes	No	3-5	No		No	Yes	No			Docetaxel/gemcitabine	4	Pelvic cavity	1961-04-22	2013-06-30	2017-01-19	2020-01-01
LGE0030	Yes	No	Yes	No	28.5667	78.4667	Open			35.0247	2	No	1	1													80	I	LGE0030	No	Yes	Yes	No	3-5	Yes	Yes	Yes	No	No	Progestin	6			Ovaries, paraaotic lymph nodes	1978-07-22	2013-07-22	2015-11-26	2020-01-01
LGE0040	Yes	No	Yes	No	4.8	24.1	Lap			46.3068	2	No	4	2														IIA	LGE0040	Yes	Yes	Yes	No	3-5	No		No	No	No					Vaginal stump	1971-09-30	2018-01-08	2018-06-01	2020-01-01
LGE0055	No	No	Yes	No	6.16667	59.6333	Open			50.2	2	Yes	1	1													57	I	LGE0055	No	Yes	Yes	No	3-5	Yes	No	Yes	No	No	Aromatase inhibitor	3			Rectum	1964-12-08	2015-02-07	2015-08-11	2020-01-01
LGE0061	No	No	Yes	Yes	11.1667	25.3667	Open			57.6658	3	Yes	5	5												Mother, liver; sisiter, lung; sister, breast	61	I	LGE0061	No	Yes	Yes	No	3-5	No		No	No	No					Lung	1958-09-15	2016-05-01	2017-04-01	2018-06-01
LGE0035	Yes	No	Yes	No	10.8	78.8	Open			44.1753	2	No	5	4														I	LGE0035	No	No	Yes	No	3-5	No		No	No	No					Vaginal stump	1969-05-20	2013-07-12	2014-06-01	2020-01-01
LGE0023	Yes	Yes	Yes	No	57.6	57.6	Hys			19.9507	1	No	0	0	No			Unmarried						Accepted repeated fertility sparing surgeries			70	I	LGE0023	No	Yes	No	No	3-5	No		No	No	No					Uterus	1995-05-02	2015-04-09	2020-01-01	2020-01-01
LGE0039	Yes	No	Yes	No	13.5667	54.1	Lap			49.8493	2	No	3	1														IC	LGE0039	Yes	Yes	No	No	3-5	No		No	No	No					Vaginal stump	1966-02-27	2015-12-22	2017-02-01	2020-06-01
LGE0058	No	No	Yes	No	31.4333	60.8667	Open			54.9315	3	Yes	3	3														IC	LGE0058	No	Yes	No	No	3-5	No		No	No	No					Vaginal stump, pelvic cavity	1960-02-09	2015-01-01	2017-08-01	2020-01-01
LGE0007	Yes	Yes	Yes	No	9.43333	66.3333	Open			36.5096	2	No	0	0	No			During treatment						Accepted non-fertility sparing surgeries after live birth			140	IIB	LGE0007	No	Yes	Yes	Yes	6-10	No		No	No	No					Pelvic cavity	1978-01-25	2014-07-21	2015-04-30	2020-01-01
LGE0019	Yes	Yes	Yes	No	18.8333	43.1667	Lap			34.5425	2	No	0	0	No			Unmarried						Accepted non-fertility sparing surgeries			46	I	LGE0019	No	Yes	Yes	Yes	6-10	No		Yes	No	No	GnRHa	6			Uterus	1981-12-08	2016-06-15	2018-01-01	2020-01-01
LGE0041	Yes	No	Yes	Yes	6.1	30.2	Lap			36.3534	2	No	2	1												Aunt, breast; grandfather, stomach	43	IB	LGE0041	No	Yes	Yes	Yes	6-10	Yes	No	No	No	No					Pelvic cavity	1979-03-12	2015-07-10	2016-01-09	2018-01-01
LGE0051	No	No	Yes	Yes	5.53333	17.4333	Open			51.5644	3	Yes	0	0														IIA	LGE0051	No	Yes	Yes	Yes	6-10	No		No	Yes	No			PI	4	Vaginal stump	1966-01-15	2017-07-27	2018-01-09	2019-01-01
LGE0047	No	No	No	No	70.6333	70.6333	Open			40.9096	2	No	4	1													99	IIA	LGE0047	Yes	Yes	Yes	No	3-5	No		Yes	Yes	No	Progestin	6	PEI	4	Lung	1973-04-26	2014-03-14	2020-01-01	2020-01-01
LGE0057	No	No	No	No	87.0333	87.0333	Lap			55.1315	3	Yes	1	1														I	LGE0057	No	Yes	Yes	Yes	5-10	No		No	No	No					Pelvic cavity	1957-10-04	2012-11-07	2020-01-01	2020-01-01
LGE0067	Yes	Yes	No	No	65.7	65.7	Hys			36.8247	2	No	2	1	Yes												30	I	LGE0067	No	Yes	Yes	No	1-3	No		No	No	No						1978-03-22	2015-01-08	2020-06-01	2020-06-01
LGE0068	Yes		No	No	42.3333	42.3333	Vaginal	Residual cervical	Myoma	53.3644	3	Yes	3	3													29		LGE0068	No	Yes	Yes	No	1-3	No		Yes	No	Yes	Progestin	36				1963-08-12	2016-12-09	2020-06-01	2020-06-01
LGE0069	No		No	No	57.8667	57.8667	Open	Ovarian	Adenomyosis	30.3068	1	No	0	0													103		LGE0069	No	Yes	Yes	No	1-3	No		Yes	Yes	No	Progestin	3	PEI	3		1985-07-07	2015-10-20	2020-07-21	2020-07-21
LGE0070	No		No	No	100.767	100.767	Open	Unknown	Myoma	60.7425	3	Yes	5	2													102		LGE0070		Yes	No	No	3-5	No		No	Yes	No			PEI	5		1951-06-10	2012-02-21	2020-06-01	2020-06-01
LGE0071	No		No	No	23.9667	23.9667	Vaginal	Vaginal	Adenomyosis	36.2192	2	No	2	2													77.7		LGE0071	No	Yes	Yes	No	1-3	No		Yes	No	Yes	Progestin	6				1981-11-02	2018-01-12	2020-01-01	2020-01-01
LGE0072	No		No	No	54.3333	54.3333	Open	Vaginal	Myoma	45.3205	2	No	2	1													35		LGE0072	No	Yes	Yes	No	1-3	No		No	No	No						1970-08-31	2015-12-15	2020-06-01	2020-06-01
LGE0073	Yes	Yes	No	No	54.8333	54.8333	Lap			32.8438	2	No	5	1	No			During treatment									50	I	LGE0073	No	Yes	Yes	No	3-5	No		Yes	No	No	GnRHa/LNG-IUS	55				1982-09-04	2015-07-01	2020-01-01	2020-01-01
LGE0074	Yes	Yes	No	No	90.0333	90.0333	Hys			15.1178	1	No	0	0	No			Unmarried										I	LGE0074	No	Yes	Yes	Yes	5-10	No		Yes	No	No	GnRHa/LNG-IUS	90				1997-07-01	2012-08-09	2020-01-01	2020-01-01
LGE0075	Yes	Yes	No	No	25.4667	25.4667	Hys			36.8055	2	No	3	2	No			None									60	I	LGE0075	No	Yes	Yes	Yes	5-10	No		Yes	No	No	LNG-IUS	24				1981-02-16	2017-11-28	2020-01-01	2020-01-01
LGE0076	Yes	Yes	No	No	36.8333	36.8333	Hys			24.526	1	No	0	0	No			Unmarried									60	I	LGE0076	No	Yes	Yes	No	1-3	No		Yes	No	No	Progestin	6				1992-06-19	2016-12-22	2020-01-01	2020-01-01
LGE0077	Yes	Yes	No	No	28.5667	28.5667	Lap			23.2301	1	No	0	0	No			Unmarried									145	I	LGE0077	No	Yes	Yes	No	1-3	No		No	No	No						1994-11-09	2018-01-26	2020-06-01	2020-06-01
LGE0078	Yes	Yes	No	No	25.3333	25.3333	Lap			40.3014	2	No	1	1	No			None									55	I	LGE0078	No	Yes	Yes	No	1-3	No		No	No	No						1978-01-23	2018-05-03	2020-06-01	2020-06-01
LGE0079	Yes	No	No	No	22.8333	22.8333	Lap			33.2247	2	No	1	0													42	I	LGE0079	No	Yes	Yes	No	1-3	No		Yes	No	No	GnRHa	2				1985-05-04	2018-07-17	2020-06-01	2020-06-01
LGE0080	Yes	No	No	No	63.4	63.4	Open			36.6027	2	No	0	0													130	I	LGE0080		Yes	Yes	No	3-5	No		Yes	No	No	GnRHa	4				1978-03-20	2014-10-17	2020-01-01	2020-01-01
LGE0081	Yes	No	No	No	80.9	80.9	Lap			29.0301	1	No	0	0													60	I	LGE0081	No	No	Yes	No	3-5	No		Yes	No	No	GnRHa/Progestin	12				1984-05-06	2013-05-10	2020-01-01	2020-01-01
LGE0082	Yes	No	No	No	62.0333	62.0333	Lap			28.6795	1	No	0	0													97	I	LGE0082	Yes	Yes	Yes	No	1-3	No		Yes	No	No	Progestin	6				1986-08-30	2015-04-28	2020-06-01	2020-06-01
LGE0083	Yes	No	No	No	37.2333	37.2333	Lap			34.7753	2	No	1	1													60	IIB	LGE0083	No	No	Yes	Yes	>10	No		Yes	No	No	Progestin	6				1982-08-10	2017-05-11	2020-06-01	2020-06-01
LGE0084	Yes	No	No	No	11.7	11.7	Lap			41.1342	2	No	0	0													50	I	LGE0084	No	Yes	Yes	No	1-3	No		Yes	No	No	Progestin	6				1977-12-07	2019-01-15	2020-01-01	2020-01-01
LGE0085	Yes	No	No	No	19.7667	19.7667	Lap			26.8904	1	No	2	2												Mother, unterine cervix	18	I	LGE0085	No	Yes	No	No	1-3	No		Yes	No	No	Progestin	12				1991-12-03	2018-10-17	2020-06-01	2020-06-01
LGE0086	Yes	No	No	No	43.4	43.4	Lap			35.5151	2	No	0	0														I	LGE0086	No	Yes	Yes	No	3-5	No		Yes	No	No	Progestin	4				1981-05-12	2016-11-07	2020-06-01	2020-06-01
LGE0087	Yes	No	No	No	11.7667	11.7667	Lap			24.526	1	No	0	0														IB	LGE0087	No	Yes	Yes	No	1-3	No		Yes	No	No	Progestin	8				1994-12-10	2019-06-14	2020-06-01	2020-06-01
LGE0088	Yes	No	No	No	20.9333	20.9333	Lap			33.9205	2	No	5	2														I	LGE0088	No	Yes	Yes	No	1-3	No		No	No	No						1984-10-19	2018-09-12	2020-06-01	2020-06-01
LGE0089	Yes	No	No	No	58.2667	58.2667	Lap			41.4082	2	No	1	1												Father, pharynx	80	I	LGE0089		Yes	Yes	No	3-5	No		No	No	No						1973-11-01	2015-03-20	2020-01-01	2020-01-01
LGE0090	Yes	No	No	No	40.4333	40.4333	Lap			42.6164	2	No	1	0													68	I	LGE0090	No	Yes	Yes	No	3-5	No		No	No	No						1974-07-05	2017-02-04	2020-06-01	2020-06-01
LGE0091	Yes	No	No	No	58.8	58.8	Lap			31.0575	2	No	1	0													30	I	LGE0091	No	Yes	Yes	No	3-5	No		No	No	No						1984-07-20	2015-08-03	2020-06-01	2020-06-01
LGE0092	No	No	No	No	77.4333	77.4333	Open			35.0685	2	No	0	0												Grandmother, uterine cervix		IIB	LGE0092	Yes	Yes	Yes	No	1-3	Yes	No	No	Yes	Yes			PI/PA	6		1979-01-05	2014-01-21	2020-06-01	2020-06-01
LGE0093	No	No	No	No	76.0667	76.0667	Open			49.1205	2	No	4	1													40	IIB	LGE0093	No	Yes	Yes	No	1-3	Yes	No	Yes	No	Yes	GnRHa	3				1965-01-30	2014-03-03	2020-06-01	2020-06-01
LGE0094	No	No	No	No	30.3	30.3	Open			48.9863	2	No	2	2													80	IIB	LGE0094	Yes	Yes	Yes	Yes	>10	No		Yes	No	Yes	GnRHa/Progestin/Aromatase inhibitor	26				1968-12-22	2017-12-05	2020-06-01	2020-06-01
LGE0095	No	No	No	No	43.8	43.8	Lap			41.0986	2	No	4	1														I	LGE0095	No	Yes	No	No	1-3	No		Yes	No	Yes	GnRHa/Aromatase inhibitor	4				1975-05-02	2016-05-27	2020-01-01	2020-01-01
LGE0096	No	No	No	No	16.9	16.9	Lap			49.1699	2	No	0	0														IC	LGE0096	Yes	Yes	Yes	No	3-5	No		Yes	No	Yes	Progestin	12				1969-11-22	2019-01-11	2020-06-01	2020-06-01
LGE0097	No	No	No	No	27.0333	27.0333	Open			50.5233	3	No	0	0														IC	LGE0097	Yes	Yes	Yes	No	<1	No		Yes	No	Yes	Progestin	12				1967-04-17	2017-10-12	2020-01-01	2020-01-01
LGE0098	No	No	No	No	36.2	36.2	Open			42.7123	2	No	1	1													105	IVA	LGE0098	Yes	Yes	Yes	No	1-3	Yes	No	Yes	No	Yes	Progestin	16				1974-05-06	2017-01-10	2020-01-01	2020-01-01
LGE0099	No	No	No	No	71.1667	71.1667	Lap			44.6767	2	No	2	2														IIA	LGE0099	No	Yes	Yes	No	3-5	No		Yes	No	Yes	Progestin	14				1969-12-04	2014-07-28	2020-06-01	2020-06-01
LGE0101	No	No	No	No	83.3	83.3	Open			48.7068	2	No	2	1													80	IIB	LGE0101	No	Yes	Yes	No	3-5	Yes	No	No	No	Yes						1964-11-25	2013-07-29	2020-06-01	2020-06-01
LGE0102	No	No	No	No	30.4333	30.4333	Open			63.6164	3	Yes	0	0													70	IIA	LGE0102	No	Yes	Yes	No	3-5	No		No	No	Yes						1954-05-06	2017-12-01	2020-06-01	2020-06-01
LGE0103	No	No	No	No	55.2667	55.2667	Open			43.9123	2	No	0	0													66	IIA	LGE0103	No	Yes	No	No	3-5	Yes	No	No	No	Yes						1971-12-30	2015-11-17	2020-06-01	2020-06-01
LGE0104	No	No	No	No	47.6333	47.6333	Lap			34.3562	2	No	3	1													54	I	LGE0104		Yes	Yes	No	3-5	No		No	No	Yes						1981-10-03	2016-02-02	2020-01-01	2020-01-01
LGE0105	No	No	No	No	94.6333	94.6333	Open			47.337	2	No	4	1													35	I	LGE0105		Yes	Yes	Yes	5-10	Yes	No	No	No	Yes						1965-05-04	2012-08-23	2020-06-01	2020-06-01
LGE0106	No	No	No	No	70.4333	70.4333	Open			38.737	2	No	3	1														I	LGE0106	No	Yes	No	No	1-3	No		Yes	Yes	No	Progestin	12	PEI	4		1975-12-03	2014-08-19	2020-06-01	2020-06-01
LGE0107	No	No	No	No	23.1	23.1	Open			49.874	2	No	4	2													91	IVB	LGE0107	Yes	Yes	Yes	Yes	5-10	No		Yes	Yes	No	Aromatase inhibitor	12	PEI	6		1968-04-06	2018-02-07	2020-01-01	2020-01-01
LGE0108	No	No	No	No	15.2667	15.2667	Open			42.4438	2	No	3	2													88	I	LGE0108	No	Yes	Yes	No	3-5	No		No	Yes	No			PEI	1		1976-09-30	2019-03-01	2020-06-01	2020-06-01
LGE0109	No	No	No	No	71.1333	71.1333	Open			37.6137	2	No	3	1													80	IV	LGE0109	No	Yes	Yes	No	1-3	Yes	No	No	Yes	No			PEI	3		1976-12-26	2014-07-29	2020-06-01	2020-06-01
LGE0110	No	No	No	No	35.3333	35.3333	Open			32.9836	2	No	4	2													64	I	LGE0110	Yes	Yes	Yes	No	<1	No		No	Yes	No			PEI	3		1984-07-21	2017-07-07	2020-06-01	2020-06-01
LGE0111	No	No	No	No	39.3	39.3	Open			21.1041	1	No	1	1														I	LGE0111	No	Yes	Yes	Yes	5-10	No		Yes	No	No	GnRHa	4				1996-02-06	2017-03-10	2020-06-01	2020-06-01
LGE0112	No	No	No	No	24.7667	24.7667	Open			33	2	No	1	1												Grandmother, lung; aunt, breast	35	IIA	LGE0112	Yes	No	Yes	No	3-5	No		Yes	No	No	GnRHa	3				1984-12-27	2017-12-19	2020-01-01	2020-01-01
LGE0113	No	No	No	No	32.5333	32.5333	Lap			49.6384	2	No	3	1													48	IIB	LGE0113	No	No	Yes	No	1-3	No		Yes	No	No	GnRHa/Aromatase inhibitor	6				1968-02-21	2017-09-29	2020-06-01	2020-06-01
LGE0114	No	No	No	No	13.9667	13.9667	Open			43.3315	2	No	3	1											Thyroid		123	IIIB	LGE0114	No	Yes	Yes	No	3-5	No		Yes	No	No	Progestin	16				1975-12-20	2019-04-09	2020-06-01	2020-06-01
LGE0115	No	No	No	No	47.9667	47.9667	Open			42.9562	2	No	4	0													117	IIB	LGE0115		Yes	Yes	No	3-5	No		Yes	No	No	Progestin	12				1973-07-20	2016-06-23	2020-06-01	2020-06-01
LGE0116	No	No	No	No	41.6667	41.6667	Open			35.2247	2	No	1	1													100	IVB	LGE0116		Yes	Yes	Yes	5-10	No		Yes	No	No	Progestin	18				1981-10-17	2016-12-29	2020-06-01	2020-06-01
LGE0117	No	No	No	No	47.9333	47.9333	Open			49.7397	2	No	2	2													97	IVB	LGE0117		Yes	Yes	No	3-5	No		Yes	No	No	Progestin	12				1966-10-10	2016-06-24	2020-06-01	2020-06-01
LGE0118	No	No	No	No	67.3	67.3	Open			34.1014	2	No	3	2													96	IIB	LGE0118	Yes	Yes	Yes	No	3-5	No		Yes	No	No	Progestin	6				1980-10-23	2014-11-21	2020-06-01	2020-06-01
LGE0119	No	No	No	No	24.6667	24.6667	Open			46.4822	2	No	4	2													75	I	LGE0119	No	Yes	No	No	1-3	No		Yes	No	No	Progestin	6				1971-07-11	2017-12-22	2020-01-01	2020-01-01
LGE0120	No	No	No	No	97.7333	97.7333	Lap			48.6274	2	No	6	3												Mother, stomach	74	I	LGE0120	No	Yes	Yes	No	3-5	No		Yes	No	No	Progestin	12				1963-10-18	2012-05-22	2020-06-01	2020-06-01
LGE0121	No	No	No	No	58.5667	58.5667	Lap			43.8575	2	No	3	1													63	I	LGE0121		Yes	Yes	No	1-3	No		Yes	No	No	Progestin	9				1971-10-12	2015-08-10	2020-06-01	2020-06-01
LGE0122	No	No	No	No	28.0333	28.0333	Lap			42.5562	2	No	3	1													63	I	LGE0122	No	Yes	Yes	Yes	5-10	No		Yes	No	No	Progestin	9				1975-03-04	2017-09-12	2020-01-01	2020-01-01
LGE0123	No	No	No	No	93.4667	93.4667	Open			21.9781	1	No	0	0													60	I	LGE0123	No	Yes	Yes	No	1-3	No		Yes	No	No	Progestin	12				1990-10-11	2012-09-27	2020-06-01	2020-06-01
LGE0124	No	No	No	No	98.3333	98.3333	Lap			52.2767	3	Yes	4	1													60	I	LGE0124		Yes	Yes	Yes	5-10	No		Yes	No	No	Progestin	6				1960-02-06	2012-05-04	2020-06-01	2020-06-01
LGE0125	No	No	No	No	61.9667	61.9667	Open			38.3644	2	No	1	1													53	IC	LGE0125	No	Yes	Yes	Yes	5-10	No		Yes	No	No	Progestin	14				1976-12-27	2015-04-30	2020-06-01	2020-06-01
LGE0126	No	No	No	No	12.8333	12.8333	Lap			47.6027	2	No	3	1													45	I	LGE0126	Yes	Yes	Yes	No	1-3	No		Yes	No	No	Progestin	19				1971-05-18	2018-12-12	2020-01-01	2020-01-01
LGE0127	No	No	No	No	31.6667	31.6667	Lap			43.8493	2	No	3	4													30	I	LGE0127	Yes	Yes	Yes	Yes	5-10	No		Yes	No	No	Progestin	12				1973-12-30	2017-10-25	2020-06-01	2020-06-01
LGE0128	No	No	No	No	31.0333	31.0333	Lap			35.9726	2	No	2	1													68	I	LGE0128	No	Yes	Yes	Yes	>10	No		Yes	No	No	Progestin	12				1981-12-02	2017-11-13	2020-06-01	2020-06-01
LGE0129	No	No	No	No	36.9667	36.9667	Open			43.737	2	No	0	0													111	IIB	LGE0129	Yes	Yes	Yes	No	3-5	Yes	No	Yes	No	No	Aromatase inhibitor	31				1973-09-03	2017-05-19	2020-06-01	2020-06-01
LGE0130	No	No	No	No	33.7333	33.7333	Lap			65.0055	3	Yes	1	1													72	IC	LGE0130	No	Yes	Yes	No	3-5	No		Yes	No	No	Aromatase inhibitor	6				1952-09-07	2017-08-24	2020-06-01	2020-06-01
LGE0131	No	No	No	No	57.8	57.8	Lap			51.4356	3	Yes	4	2											Breast	Sister, uterine endometrium	60	I	LGE0131	No	Yes	Yes	No	1-3	No		Yes	No	No	Aromatase inhibitor	6				1963-11-08	2015-04-03	2020-01-01	2020-01-01
LGE0132	No	No	No	No	13.6667	13.6667	Lap			52.5123	3	Yes	1	1													60	I	LGE0132	No	No	Yes	No	3-5	No		Yes	No	No	Aromatase inhibitor	6				1966-10-26	2019-04-18	2020-06-01	2020-06-01
LGE0133	No	No	No	No	9.63333	9.63333	Open			47	2	No	1	1													80	IC	LGE0133	Yes	No	Yes	No	1-3	No		Yes	No	No	Aromatase inhibitor	17				1972-03-29	2019-03-18	2020-01-01	2020-01-01
LGE0134	No	No	No	No	61.7667	61.7667	Lap			44	2	No	6	1														IC	LGE0134	No	Yes	Yes	No	3-5	Yes	No	No	No	No						1971-05-17	2015-05-06	2020-06-01	2020-06-01
LGE0135	No	No	No	No	68.5333	68.5333	Lap			45.0849	2	No	1	1												Father, lung		I	LGE0135	No	Yes	Yes	No	1-3	No		No	No	No						1969-09-25	2014-10-15	2020-06-01	2020-06-01
LGE0136	No	No	No	No	72.4333	72.4333	Open			47.3233	2	No	4	1												Father, stomach		I	LGE0136	No	Yes	Yes	No	1-3	No		No	No	No						1967-03-06	2014-06-20	2020-06-01	2020-06-01
LGE0137	No	No	No	No	75.8	75.8	Open			50.9123	3	Yes	4	1														I	LGE0137	No	Yes	Yes	No	3-5	No		No	No	No						1963-04-25	2014-03-11	2020-06-01	2020-06-01
LGE0138	No	No	No	No	78.7333	78.7333	Lap			48.6	2	No	2	1														I	LGE0138		Yes	Yes	No	1-3	No		No	No	No						1965-05-20	2013-12-13	2020-06-01	2020-06-01
LGE0139	No	No	No	No	59.8667	59.8667	Open			29.0795	1	No	2	0														I	LGE0139	Yes	Yes	No	No	3-5	No		No	No	No						1986-06-10	2015-07-02	2020-06-01	2020-06-01
LGE0140	No	No	No	No	20.3667	20.3667	Lap			46.1123	2	No	3	2														I	LGE0140	No	Yes	No	No	3-5	No		No	No	No						1972-08-30	2018-09-29	2020-06-01	2020-06-01
LGE0141	No	No	No	No	44.6333	44.6333	Lap			47.1836	2	No	2	2												Father, liver		IB	LGE0141	No	Yes	Yes	Yes	5-10	No		No	No	No						1969-08-07	2016-10-01	2020-06-01	2020-06-01
LGE0142	No	No	No	No	36.5333	36.5333	Lap			42.0192	2	No	6	2												Grandfather, stomach; grandmother, lymphoma; uncle, stomach		IB	LGE0142	No	Yes	Yes	No	1-3	No		No	No	No						1975-06-05	2017-06-01	2020-06-01	2020-06-01
LGE0143	No	No	No	No	88.9333	88.9333	Open			34.6219	2	No	2	1														IIA	LGE0143	No	No	Yes	No	1-3	No		No	No	No			PEI	3		1978-02-05	2012-09-11	2020-01-01	2020-01-01
LGE0144	No	No	No	No	36.0667	36.0667	Open			28.8329	1	No	1	1														IVB	LGE0144	Yes	No	Yes	No	1-3	No		No	No	No						1988-08-22	2017-06-15	2020-06-01	2020-06-01
LGE0145	No	No	No	No	14.3667	14.3667	Open			43.4959	2	No	0	0														IVB	LGE0145	Yes	Yes	Yes	No	3-5	No		No	No	No						1975-10-09	2019-03-28	2020-06-01	2020-06-01
LGE0146	No	No	No	No	87.8667	87.8667	Open			41.8137	2	No	1	1													140	IIB	LGE0146	No	Yes	Yes	No	1-3	Yes	No	No	No	No						1971-06-01	2013-03-14	2020-06-01	2020-06-01
LGE0147	No	No	No	No	29.8	29.8	Open			48.9315	2	No	2	1													120	I	LGE0147	No	Yes	Yes	No	1-3	No		No	No	No						1969-01-26	2017-12-20	2020-06-01	2020-06-01
LGE0148	No	No	No	No	67.4333	67.4333	Open			36.5836	2	No	5	1													80	IIIB	LGE0148	No	No	Yes	Yes	>10	Yes	No	No	No	No						1978-04-27	2014-11-17	2020-06-01	2020-06-01
LGE0149	No	No	No	No	50.5333	50.5333	Open			33.3151	2	No	2	1													80	I	LGE0149		Yes	No	Yes	5-10	No		No	No	No						1982-12-22	2016-04-07	2020-06-01	2020-06-01
LGE0150	No	No	No	No	57.5333	57.5333	Lap			41.2082	2	No	5	2													80	I	LGE0150		Yes	No	Yes	5-10	No		No	No	No						1974-07-06	2015-09-10	2020-06-01	2020-06-01
LGE0151	No	No	No	No	10.4667	10.4667	Open			45.9753	2	No	2	1													78	IC	LGE0151	No	Yes	Yes	No	3-5	No		No	No	No						1973-03-13	2019-02-21	2020-01-01	2020-01-01
LGE0152	No	No	No	No	85.4	85.4	Open			47.8274	2	No	4	1													74	I	LGE0152	No	Yes	No	No	3-5	No		No	No	No						1965-08-10	2013-05-27	2020-06-01	2020-06-01
LGE0153	No	No	No	No	85.1333	85.1333	Lap			43.7452	2	No	1	1													69	I	LGE0153	No	Yes	Yes	No	3-5	No		No	No	No						1969-09-16	2013-06-04	2020-06-01	2020-06-01
LGE0154	No	No	No	No	32.6667	32.6667	Lap			47.1479	2	No	3	1													67	I	LGE0154		Yes	Yes	No	1-3	No		No	No	No						1970-08-14	2017-09-25	2020-06-01	2020-06-01
LGE0155	No	No	No	No	38.9667	38.9667	Lap			30.6575	2	No	2	1													66	I	LGE0155		Yes	Yes	No	1-3	No		No	No	No						1986-03-01	2016-10-19	2020-01-01	2020-01-01
LGE0156	No	No	No	No	77.8333	77.8333	Lap			50.989	3	No	2	1													61	I	LGE0156	No	Yes	Yes	Yes	5-10	No		No	No	No						1963-01-26	2014-01-09	2020-06-01	2020-06-01
LGE0157	No	No	No	No	11.9	11.9	Lap			36.9507	2	No	2	1												Father, liver	60	I	LGE0157	No	Yes	Yes	No	3-5	No		No	No	No						1982-07-07	2019-06-10	2020-06-01	2020-06-01
LGE0158	No	No	No	No	26.6	26.6	Lap			44.8247	2	No	3	1											Breast		60	I	LGE0158	No	Yes	No	No	3-5	No		No	No	No						1973-06-09	2018-03-26	2020-06-01	2020-06-01
LGE0159	No	No	No	No	23.2667	23.2667	Lap			41.2411	2	No	1	1													60	I	LGE0159	Yes	Yes	No	No	1-3	No		No	No	No						1977-04-17	2018-07-04	2020-06-01	2020-06-01
LGE0160	No	No	No	No	24.2	24.2	Open			46.4164	2	No	1	1													50	I	LGE0160	No	Yes	Yes	No	1-3	No		No	No	No						1972-01-17	2018-06-06	2020-06-01	2020-06-01
LGE0161	No	No	No	No	91.1	91.1	Lap			50.5151	3	Yes	3	1													50	I	LGE0161	No	Yes	Yes	No	3-5	No		No	No	No						1962-06-15	2012-12-07	2020-06-01	2020-06-01
LGE0162	No	No	No	No	61.7	61.7	Open			53.074	3	Yes	4	3													50	I	LGE0162	No	Yes	Yes	No	1-3	No		No	No	No						1962-04-24	2015-05-08	2020-06-01	2020-06-01
LGE0163	No	No	No	No	73	73	Open			48.1315	2	No	1	1													50	I	LGE0163	No	Yes	Yes	Yes	5-10	No		No	No	No						1965-11-27	2014-01-02	2020-01-01	2020-01-01
LGE0164	No	No	No	No	40.6667	40.6667	Lap			46.2904	2	No	3	1													50	I	LGE0164	No	Yes	Yes	Yes	5-10	No		No	No	No						1970-05-27	2016-08-29	2020-01-01	2020-01-01
LGE0165	No	No	No	No	62.3	62.3	Lap			44.2384	2	No	12	2													43	II	LGE0165	No	Yes	Yes	No	1-3	No		No	No	No						1971-02-03	2015-04-20	2020-06-01	2020-06-01
LGE0166	No	No	No	No	47.8	47.8	Lap			34.9808	2	No	1	1													42	I	LGE0166	No	Yes	Yes	No	<1	No		No	No	No						1981-07-14	2016-06-28	2020-06-01	2020-06-01
LGE0167	No	No	No	No	84.6	84.6	Lap			46.7068	2	No	3	1													40	I	LGE0167	No	No	Yes	No	3-5	No		No	No	No						1966-10-17	2013-06-20	2020-06-01	2020-06-01
LGE0168	No	No	No	No	53.1333	53.1333	Open			44.7479	2	No	3	1												Father, colon	40	IB	LGE0168	No	Yes	Yes	No	3-5	No		No	No	No						1970-12-02	2015-08-21	2020-01-01	2020-01-01
LGE0169	No	No	No	No	78.3333	78.3333	Lap			43.137	2	No	6	2													34	I	LGE0169		Yes	Yes	No	1-3	No		No	No	No						1970-11-16	2013-12-25	2020-06-01	2020-06-01
LGE0170	No	No	No	No	82.1	82.1	Open			48.7315	2	No	2	1													32	I	LGE0170	No	Yes	Yes	Yes	>10	No		No	No	No						1964-12-22	2013-09-03	2020-06-01	2020-06-01
LGE0171	No	No	No	No	85.3667	85.3667	Open			41.3589	2	No	6	1													30	I	LGE0171	No	Yes	No	No	3-5	Yes	No	No	No	No						1972-01-28	2013-05-28	2020-06-01	2020-06-01
LGE0172	No	No	No	No	45.4333	45.4333	Lap			48.1151	2	No	3	1													26	I	LGE0172	No	Yes	Yes	No	3-5	No		No	No	No						1968-08-08	2016-09-07	2020-06-01	2020-06-01
LGE0173	No	No	No	No	20.4	20.4	Lap			67.9671	3	Yes	0	0													20	I	LGE0173	No	Yes	Yes	No	3-5	No		No	No	No						1950-10-27	2018-09-28	2020-06-01	2020-06-01
