# Supplementary material for: Fertility-sparing treatment for low-grade endometrial stromal sarcoma
Source: Research Square preprint supplement (doi:10.21203/rs.3.rs-7098205/v1), 2025-08-27
Supplement: Supplementary file 2 [file aa7c114a93c8374d71414bbd.docx]

**Table S2. Hazard ratios (HRs) with 95% confidence intervals (95% CIs) for recurrence or mortality in various populations.**

|  | HR (95% CI) | *p* |
| --- | --- | --- |
| Recurrence |  |  |
| Fertility sparing (versus no sparing) | 3.5 (1.6-7.6) | **0.002** |
| Fertility sparing in patients with ovarian preservation (versus no sparing) | 1.1 (0.4-2.8) | 0.810 |
| Fertility sparing in stage I patients (versus no sparing) | 2.6 (1.0-6.4) | **0.041** |
| Ovarian preservation (versus no preservation) | 5.2 (2.4-11.3) | **<0.001** |
| Ovarian preservation in stage I patients (versus no preservation) | 3.1 (1.3-7.4) | **0.011** |
| Age groups |  | 0.200 |
| ≤30 years | Reference |  |
| 31-50 years | 0.5 (0.2-1.1) | 0.092 |
| >50 years | 0.8 (0.2-2.5) | 0.704 |
| Menopause (versus premenopause) | 2.1 (0.8-5.2) | 0.108 |
| Advanced stages (stage III/IV, versus stage I/II) | 1.0 (0.2-4.3) | 0.988 |
| Lymphovascular space invasion (postive versus negative) | 1.3 (0.5-3.2) | 0.594 |
| Surgical routes |  | 0.382 |
| Hysteroscopy | Reference |  |
| Laparoscopy | 0.6 (0.2-2.0) | 0.376 |
| Laparotomy | 1.0 (0.3-3.3) | 0.956 |
| Retroperitoneal lymphadenectomy (versus not done) | 1.7 (0.7-4.3) | 0.239 |
| Hormone treatment (versus not done) | 0.8 (0.4-1.8) | 0.685 |
| Chemotherapy (versus not done) | 1.5 (0.4-4.9) | 0.526 |
| Radiotherapy (versus not done) | 0.5 (0.1-2.2) | 0.523 |
| Mortality |  |  |
| Fertility sparing (versus no sparing) | 0.04 (0.0-N/A) | 0.626 |
| Ovarian preservation (versus no preservation) | 1.1 (0.1-12.4) | 0.922 |

N/A, not available.
