# Supplementary material for: Fertility-sparing treatment for low-grade endometrial stromal sarcoma
Source: Research Square preprint supplement (doi:10.21203/rs.3.rs-7098205/v1), 2025-08-27
Supplement: Supplementary file 3 [file f75f7202127a0bafac003f81.docx]

**Table S3. Post-recurrent treatment for patients with fertility-sparing surgery.**

| No | Recurrent sites | Treatment after recurrence |
| --- | --- | --- |
| LGE0006 | Peritoneal and pelvic cavity | Accepted non-fertility sparing surgery after recurrence, and remained disease-free up to June 1, 2020 |
| LGE0019 | Uterus |
| LGE0020 | Peritoneal and pelvic cavity |
| LGE0022 | Uterus |
| LGE0001 | Uterus, lung |
| LGE0002 | Uterus, lung |
| LGE0007 | Pelvic cavity |
| LGE0023 | Uterus | Accepted repeated fertility sparing surgery after recurrence, and then relapse again on December 16, 2015. The patient accepted non-fertility sparing surgery and remained disease-free up to June 1, 2020 |
| LGE0004 | Retroperitoneal lymph nodes | Accepted repeated fertility sparing surgeries after recurrence, and then relapse again on May 1, 2016. The patient accepted non-fertility sparing surgery and remained disease-free up to June 1, 2020 |
| LGE0021 | Pelvic cavity | Accepted repeated fertility sparing surgeries after recurrence, then relapse again on November 19, 2015. The patient accepted non-fertility sparing surgery and remained disease-free up to June 1, 2020 |
